# Supplementary material for: TP53I11 suppresses epithelial-mesenchymal transition and metastasis of breast cancer cells
Source: PubMed Central journal article supplement — BMB Rep. 2019 Jun 30;52(6):379–84. doi: 10.5483/BMBRep.2019.52.6.173 (PMC6605526; doi:10.5483/bmbrep.2019.52.6.173), 2019-06-30
Supplement: BMB-52-379_Supple.pdf [file BMB-52-379_Supple.pdf]

1 **Article**

2 **TP53I11 Suppresses Epithelial-mesenchymal Transition and Metastasis of Breast**  
3 **Cancer Cells**

4 **Tongqian Xiao<sup>1,2</sup>, Zhongjuan Xu<sup>1</sup>, Hai Zhang<sup>1</sup>, Junsa Geng<sup>1,4</sup>, Yong Qiao<sup>1</sup>, Yu Liang<sup>1,3</sup>, Yanzhen Yu<sup>1,4</sup>,**  
5 **Qun Dong<sup>5\*</sup>, Guangli Suo<sup>1\*</sup>**

6 1. CAS Key Laboratory of Nano-Bio Interface, Suzhou Institute of Nano-Tech and Nano-Bionics,  
7 Chinese Academy of Sciences, Jiangsu 215123, China

8 2. University of Chinese Academy of Sciences, Beijing 100049, China

9 3. School of Life Sciences, Shanghai University, Shanghai 200444, China

10 4. University of Science and Technology of China, Anhui 230026, China

11 5. Taikang National Pathology Center, Taikang Xianlin Drum Tower Hospital, Jiangsu 210046, China

12 Running title: TP53I11 inhibit HIF1 $\alpha$  protein level

13 Keywords: TP53I11, EMT, metastasis, HIF1 $\alpha$ , hypoxia

14 #Corresponding authors:

15 Guangli Suo:

16 Address: Suzhou Institute of Nano-Tech and Nano-Bionics, Chinese Academy of Sciences, 398 Ruoshui  
17 Road, Suzhou Industrial Park, Suzhou, Jiangsu Province, 215123, China

18 Email: [glsoo2013@sinano.ac.cn](mailto:glsoo2013@sinano.ac.cn); Phone: 86-512-62872823; Fax: 86-512-62872569

19 Qun Dong

20 Address: Taikang National Pathology Center, Taikang Xianlin Drum Tower Hospital, Jiangsu 210046, China

21 Email: [td000777@gmail.com](mailto:td000777@gmail.com); Phone: 86-025-85358120

**A**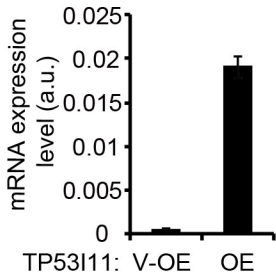

TP53I11: V-OE OE

TP53I11

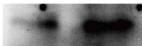

GAPDH

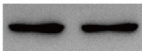**B**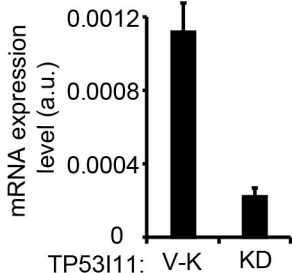

TP53I11: V-K KD

TP53I11

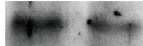

GAPDH

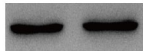

**Fig. S1.** The construct of MDA-MB-231 derived cells

(A) TP53I11 was stably overexpressed, and (B) endogenous TP53III was stably knocked down in MDA-MB-231 cells. The expression levels of TP53I11 were assessed by qRT-PCR and immunoblotting assays.

**Table S1.** Primer sequences used in the study

| Genes   | Application          | Primer Sequences |                                                                       |
|---------|----------------------|------------------|-----------------------------------------------------------------------|
| TP53I11 | cDNA clone           | Forward:         | 5'-GCACCGGTTGGAGGAGAAGATGGCGGCCAAGC-3'                                |
|         |                      | Reverse:         | 5'-GCTTAATTAAGCCTAGGCCTTCTTGGGTCTTCG-3'                               |
| TP53I11 | Real time<br>qRT-PCR | Forward:         | 5'-GGCTCAGGGTCTGGCAGTT-3'                                             |
|         |                      | Reverse:         | 5'-CCATCAAAGACCGCATCATAGA-3'                                          |
| GAPDH   | Real time<br>qRT-PCR | Forward:         | 5'-ACCCACTCCTCCACCTTTGA-3'                                            |
|         |                      | Reverse:         | 5'-TGTTGCTGTAGCCAAATTCGTT-3'                                          |
| TP53I11 | shRNA                |                  | 5'-CCGGCGTCATCAGCATTACTACTACTCGAGTAG<br>TAGTAAATGCTGATGACGTTTTTTTG-3' |
